# Supplementary material for: Retinal Photoreceptor Protection in an AMD-Related Mouse Model by Selective Sigma-1 or Sigma-2 Receptor Modulation
Source: MDPI journal article supplement (doi:10.3390/genes13122386), 2022-12-16
Supplement: s1 [file s1]

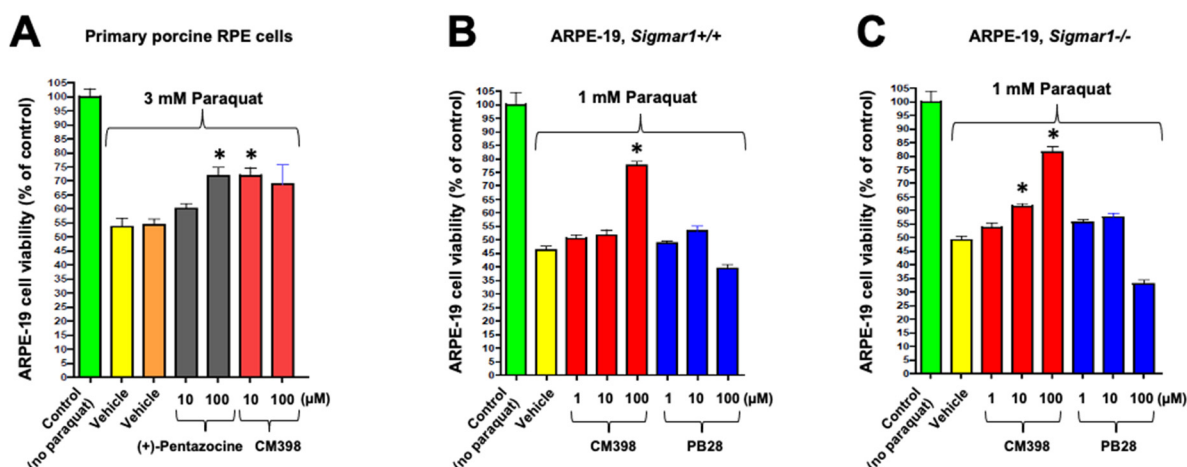

**Figure S1.** (+)-pentazocine and CM398 protect ARPE-19 cells against paraquat-induced cytotoxicity. Primary RPE cells were isolated from porcine eyes. The brown bar is an additional control, and the brown and yellow bars are the same vehicle condition. (B and C). ARPE-19 cells were purchased from American Type Culture Collection (ATCC, Manassas, VA). The S1R knockout ARPE-19 cell line was generated using the CRISPR-Cas9 gene editing approach [55]. Cells were cultured to ~80% confluency. Before paraquat treatment, the cell culture was treated with (+)-pentazocine, CM398, or PB28 (antagonist for S1R and putative agonist for S2R) to the indicated concentrations or vehicle control (equal amount of DMSO). The cells were treated with 3 mM (A), primary porcine RPE) or 1 mM (B), ARPE-19) paraquat for 24 h and then used for MTT assay to measure cell viability. Quantification: Mean  $\pm$  SD,  $n = 3$ , one-way ANOVA with Bonferroni test, \*  $p < 0.05$  (compared to the basal condition represented by the yellow bar).
